# Supplementary material for: Genome-wide identification and expression profile analysis of nuclear factor Y family genes in Sorghum bicolor L. (Moench)
Source: PLoS One. 2019 Sep 19;14(9):e0222203. doi: 10.1371/journal.pone.0222203 (PMC6752760; doi:10.1371/journal.pone.0222203)
Supplement: S2 Table — (DOC) [file pone.0222203.s010.doc]

**S2 Table. *SbNF-Y* gene specific primers used for gene expression analysis**

| S.  No. | Gene name | Primer | Amplicon length |
| --- | --- | --- | --- |
|  | *NF-YA1* | F: ATTCCATCCGGCCAAGAATC | 107 |
| R: GAGGAGATTGAAGCTGACGG |
|  | *NF-YA2* | F: CGATAATGACCCCCAACCTG | 118 |
| R: GGTGAGTGGCGGATAAGAAG |
|  | *NF-YA3* | F: CCGTGCCTATGTTAAAAGCG | 114 |
| R: AGCTGTTGGCCCTTATCTCT |
|  | *NF-YA4* | F:GCTGCACAAGTACCACCAT | 108 |
| R:TAGTACGACGCAGTGCCATA |
|  | *NF-YA5* | F:AGCAGAACCAGCAGTACCAG | 113 |
| R:ACCTGCAGTGTCAGAAGAGG |
|  | *NF-YA6* | F:CAACTCATCTACGGCTTGGT | 109 |
| R:GCAAGAGCTGAAGAAACAGC |
|  | *NF-YA7* | F: CACCTATAGTGAGCACGTCG | 115 |
| R: GCCAACTGACCAGTAGTAGC |
|  | *NF-YA8* | F: GACTGTGGACTGTGGTGATG | 109 |
| R: CTGGGACTGTCTGAAACGAG |
|  | *NF-YB1* | F: CACGGACATGGTCCTTGAAA | 100 |
| R: TTGTCGTCGCTCTTTCTTCC |
|  | *NF-YB2* | F: GCCACGGCCAATGATATGT | 120 |
| R: CAGTGAAGTCCTAAGGGGCT |
|  | *NF-YB3* | F: GATGGTCATGGGTGGGAAAG | 116 |
| R: CAAAGTGTTTGCTGCATGGG |
|  | *NF-YB4* | F: GACAACATCCAGGGCATCAC | 118 |
| R: CGAGGAAGATCTTGAGCACG |
|  | *NF-YB5* | F: CCATCCTCGCTAAATCGGAC | 99 |
| R: TCGCTATTTCGATGTGCGTC |
|  | *NF-YB6* | F: GACAACATCCAGGGCATCAC | 118 |
| R: CGAGGAAGATCTTGAGCACG |
|  | *NF-YB7* | F: CGCATCATGAAGCAGATCCT | 92 |
| R: AAGCTGATGAACTCGGAGAC |
|  | *NF-YB8* | F: ATGCGTTTCCGATGAGGAG | 115 |
| R: GTTATCAGGTGAAGTGTGCG |
|  | *NF-YB9* | F: CACCACGACATGCAGATG | 137 |
| R: TAGGGGTAAGGCAGGTAGTG |
|  | *NF-YB10* | F:CGAACGCCAAGATCTCCAAG | 122 |
| R:GTTGATGGTCTTGCGCTTCT |
|  | *NF-YB11* | F: TTGGACAACCTTGTCAACCC | 119 |
| R: GAGTGGAATCGAGGAGGAGT |
|  | *NF-YB12* | F: CAATCCCAGCAAGACGATCA | 109 |
| R: GAAGGCTGTGGGTCTTGAAA |
|  | *NF-YB13* | F:CGAGATCCGCAAGTACCAGA | 100 |
| R:GAGGTCGGTCTTGAAGTCCT |
|  | *NFY-B14* | F: TCAAGCACGCTCCTTATTCG | 92 |
| R: AAGATGGCGGGAAGTTGAAG |
|  | *NF-YB15* | F: CCGACTTGCTAAAAGAGGCT | 108 |
| R: TCCTTTGTGTTCGTCTGGTG |
|  | *NF-YB16* | F: TGCTCCAAGGACAAACACG | 119 |
| R: CGTCTCGATGATCTTCACGG |
|  | *NF-YB17* | F: GCGACGATTTTCTCCTGACT | 116 |
| R: CCGGATTATCACCGTGTTGG |
|  | *NF-YB18* | F: GAGTACACGATCCCGAAAGC | 101 |
| R: CACTGGTCCACAGTCTCTTTG |
|  | *NF-YB19* | F: TTACAAGGTATGCAAGCGCC | 104 |
| R: GCAGTAGACTAAGGGCGTTC |
|  | *NF-YC1* | F:CGGTGAAGGATCGTAAGAAG | 106 |
| R:GCAACTCTCTGCGGTACAAA |
|  | *NF-YC2* | F: GGAGCAATTCTCCAGGCTTT | 102 |
| R: CCTTACCTGAGTTTTCGGCT |
|  | *NF-YC3* | F: GAAGATCATGAAGGCCGACG | 99 |
| R: ATGGTGAGCTCGAGGATGAA |
|  | *NF-YC4* | F:CCCGCATCAAGAAGATCA | 106 |
| R:GTGAGCTCGAGGATGAACA |
|  | *NF-YC5* | F: AGGCAATGGAGAAGGATGGA | 116 |
| R: CTTATTGATGTCCCGGTCCAC |
|  | *NF-YC6* | F: CAGCAAAGGACGTCGAGAA | 116 |
| R: CGTCAACACTCAACAGCACT |
|  | *NF-YC7* | F: TCTATAGAGGAAGCCGAGGTG | 118 |
| R: GTGTCCTTCTCCATCTTGGG |
|  | *NF-YC8* | F: GAAAGCTCACCGCTTTGTTG | 119 |
| R: CCTAGACAATGACAAGGGCG |
|  | *NF-YC9* | F:CCACCGACTTCAAGAACCAC | 140 |
| R:GGTGAGCTCGAGGATGAACA |
|  | *NF-YC10* | F: TACATGCGGATTGACGAACC | 114 |
| R: AACCAGATGGGATGAAAGCG |
|  | *NF-YC11* | F: CAATCCCAGCAAGACGATCA | 109 |
| R: GAAGGCTGTGGGTCTTGAAA |
|  | *NF-YC12* | F: GTGACCTTCACTCGACATCC | 110 |
| R: ATAGAGCCCCAGAGGTGAAC |
|  | *NFY-C13* | F: GCAATGGCCCTATTTCCACT | 119 |
| R: TGTGTCTAACCTTCCATGCG |
|  | *NF-YC14* | F: CCATCTGTTCCACGGTCAAA | 107 |
| R: AAAGCAAACTGGACAGGGTC |
|  | *NF-YC15* | F: TGCTTCGGTTCTTACTGTCG | 115 |
| R:ACTGAGGATCTGTTGGGTCA |
| 43. | *PP2A* | F: AACCCGCAAAACCCCAGACTA | 138 |
| R: TACAGGTCGGGCTCATGGAAC |
| 44. | *EIF4α* | F:CAACTTTGTCACCCGCGATGA | 144 |
| R:TCCAGAAACCTTAGCAGCCCA |
