# Supplementary material for: Genome-wide identification and expression profile analysis of nuclear factor Y family genes in Sorghum bicolor L. (Moench)
Source: PLoS One. 2019 Sep 19;14(9):e0222203. doi: 10.1371/journal.pone.0222203 (PMC6752760; doi:10.1371/journal.pone.0222203)
Supplement: S3 Table — (XLSX) [file pone.0222203.s011.xlsx]

## Sheet: HMMER
		S3 Table. The reliability of identified SbNF-Ys
Sorghum bicolor	Oryza sativa			Setaria italica			Zea mays
	GRAMENE		HMMER	GRAMENE		HMMER	GRAMENE		HMMER
SbNFY Gene	Gene ID	Chr/Localization	Protein ID.	Gene ID	Chr/Localization	Protein ID	Chr/Localiz.	Protein ID	Protein ID
SbNF-YA1	Os03t0647600	3: 25069214-25074703	Q60DJ8_ORYSJ	SETIT_036465	IX: 10218153-10222257	K4AC58_SETIT	Zm00001d033215	1: 254416539-254420845	C0PNR4_MAIZE
SbNF-YA2	Os03g0411000	3:16951185-16951346	Q75K31_ORYSJ	SETIT_034410mg	IX:42740120-42740465	A0A368SPT1_SETIT	Zm00001d029487	1:72832149-72832670	A0A1D6K5H4_MAIZE
SbNF-YA3	Os03g0174900	3: 4002089-4005420	Q10R12_ORYSJ	SETIT_037269mg	IX: 54975471-54978833	K4AEG2_SETIT	Zm00001d027874	1: 16038734-16042002	C0HIE4_MAIZE
SbNF-YA4	Os07t0158500	7: 3127749-3130514	A0A0N7KMY8_ORYSJ	SETIT_032469mg	II: 3082111-3083153	A0A368PV49_SETIT	Zm00001d007882	2: 241672970-241675483	A0A1D6F9G6_MAIZE
SbNF-YA5	Os07g0608200	7: 24996740-25001214	Q852G5_ORYSJ	SETIT_030663mg	II:45318046-45318213	K3ZVN2_SETIT	Zm00001d006835	2: 217595882-217600202	B4FHR0_MAIZE
SbNF-YA6	Os02g0776400	2: 32794229-32798340	A0A0N7KG67_ORYSJ	SETIT_019645mg	I:39514893-39515302	A0A368PUD3_SETIT	Zm00001d018255	5: 217462041-217466991	A0A1D6HLV3_MAIZE
SbNF-YA7	Os12g0613000	12: 25953474-25957331	Q2QM93_ORYSJ	SETIT_023231mg	III:49624173-49624338	K3Z9K5_SETIT	Zm00001d041491	3: 123760201-123767258	C0PEF7_MAIZE
SbNF-YA8	Os12g0618600	12: 26346896-26351207	Q2QM38_ORYSJ	SETIT_022607mg	III:49145719-49146052	A0A368QNH5_SETIT	Zm00001d031092	1: 176869959-176875893	A0A1D6KGE6_MAIZE
SbNF-YB1	Os03t0413000	3: 17085270-17086334	NFYB8_ORYSJ	SETIT_038696mg	IX:42605623-42605981	A0A368SPM1_SETIT	Zm00001d029505	1:73576189-73576568	A0A1D6K5M3_MAIZE
SbNF-YB2	Os09t0568200	9: 22690177-22691820	A0A0P0XQL1_ORYSJ	SETIT_031288mg	II:15465685-15465819	K3ZXF6_SETIT	Zm00001d019865	7: 71121964-71124116	B6TCI2_MAIZE
SbNF-YB3	Os07t0606600	7: 24921067-24921998	NFYBA_ORYSJ	SETIT_031069mg	II:45371333-45371704	K3ZWT7_SETIT	Zm00001d022099	7: 170256890-170257680	A0A1D6IJ69_MAIZE
SbNF-YB4	Os07g0549900	7:21827283-21827600	Os01g0835900	SETIT_018796mg	I:34772909-34773219	A0A368Q6I7_SETIT	Zm00001d008669	8: 16558205-16558516	A0A1D6IAU4_MAIZE
SbNF-YB5	Os01t0834400	1: 35756352-35758663	NFYB3_ORYSJ	SETIT_003159mg	SETIT_003159mg	K3XMN6_SETIT	Zm00001d042968	3: 185334729-185336842	A0A1D6N7R4_MAIZE
SbNF-YB6	Os05g0462700	5:22736865-22737176	Os01g0835900	SETIT_003454mg	V:40868333-40868644	SETIT_018796mg	Zm00001d042954	3: 184749677-184749988	B4FD59_MAIZE
SbNF-YB7	Os01t0935200	1: 41028860-41030025	Q942Y5_ORYSJ	SETIT_004874mg	V:45763282-45763608	A0A368RFG3_SETIT	Zm00001d042196	3: 155843175-155843714	A0A1D6N242_MAIZE
SbNF-YB8	Os02t0725700	2: 30164300-30165377	NFYB1_ORYSJ	SETIT_018339mg	I:36782844-36783100	A0A368PR77_SETIT	Zm00001d017899	5:209742746-209743004	A0A1D6HJ17_MAIZE
SbNF-YB9	Os02t0725700	2: 30164300-30165377	Q6ZFM9_ORYSJ	SETIT_020091mg	I:36767936-36768249	K3Z0M5_SETIT	Zm00001d017898	5: 209724572-209725408	Q94EJ7_MAIZE
SbNF-YB10	(Os03t0413000	3: 17085270-17086334	HD5_ORYSJ	SETIT_014286mg	VI:3550943-3551270	K3YJ67_SETIT	Zm00001d049485	4: 31972821-31973600	K7TT56_MAIZE
SbNF-YB11	Os08g0383700	8:18089718-18089803	Q6YW78_ORYSJ	SETIT_013802mg	VI:21928338-21928573	K3YHT3_SETIT	Zm00001d032331	1:222706057-222706349	B6U5I1_MAIZE
SbNF-YB12	Os08g0206500	8:6212357-6212462	Q6H707_ORYSJ		VI:2608055-2608134	A0A368RHD9_SETIT	Zm00001d028432	1: 34899450-34900187	B4FWZ1_MAIZE
SbNF-YB13	Os01g0866200	1:37513897-37514307	H32_ORYSJ	SETIT_023606mg	III:18777008-18777418	K3ZAN5_SETIT	Zm00001d012276	8:171740107-171740516	B4FBW9_MAIZE
SbNF-YB14	Os03t027900	3: 9492827-9493512	H2B1_ORYSJ	SETIT_022270mg	III:17551527-17551841	K3XMW5_SETIT	Zm00001d051591	4: 163976517-163976981	B4FYZ0_MAIZE
SbNF-YB15	Os05t0463800	5: 22770094-22774082	NFYB3_ORYSJ	SETIT_023400mg	III:17305249-17305484	K3ZA33_SETIT	Zm00001d010574	8: 120713490-120716661	A0A1D6FS52_MAIZE
SbNF-YB16	Os05t0573500	5: 28572426-28575154	NFYB4_ORYSJ	SETIT_024597mg	III:9660575-9660717	A0A368QEY6_SETIT	Zm00001d039957	3: 20590750-20592623	A0A1D6FKV4_MAIZE
SbNF-YB17	Os06t0285200	6: 10137823-10138746	Q5VNF4_ORYSJ	SETIT_008357mg	IV:12927990-12928282	A0A368QTH6_SETIT	Zm00001d045772	9: 38367392-38368180	K7V8D5_MAIZE
SbNF-YB18	Os02t0725700	2: 30164300-30165377	Os03g0413000		VIII:35336047-35336071	A0A368QTH7_SETIT	Zm00001d019101	7: 16745486-16746406	A0A1D6HV39_MAIZE
SbNF-YB19	-	6:14053642-14053665	NFYB8_ORYSJ	SETIT_016487mg	I:1710872-1710891	A0A368QTH7_SETIT	Zm00001d019101	7: 16745486-16746406	A0A1D6HV39_MAIZE
SbNF-YC1	Os03t0852300	3: 35890202-35894172	Q10AH3_ORYSJ	SETIT_039302mg	IX:417684-417969	A0A368SBV5_SETIT	Zm00001d034872	1: 304416011-304432351	A0A096R9U6_MAIZE
SbNF-YC2	Os03g0743400	3:30515973-30516270	CML4_ORYSJ	SETIT_039628mg	IX:5835627-5835924	A0A368SET9_SETIT	Zm00001d033979	1:279977713-279978010	B4FH55_MAIZE
SbNF-YC3	Os03t0251350	3: 7976995-7979371	NFYC2_ORYSJ	SETIT_037200mg	IX:51136366-51136820	K4AE93_SETIT	Zm00001d028432	1: 34899450-34900187	B6SWV5_MAIZE
SbNF-YC4	Os09t0480700	9: 18451612-18452708	Q0J0W2_ORYSJ		II:35135395-35135833	A0A368Q2Y8_SETIT	Zm00001d020874	7: 135216263-135216865	B6SII8_MAIZE
SbNF-YC5	Os01g0183400	1:4415764-4416017	Q5VRY6_ORYSJ	SETIT_004603mg	V:11161126-11161454	K3XRQ9_SETIT	Zm00001d039581	3: 8291514-8292125	A0A060D557_MAIZE
SbNF-YC6	Os11t0544700	11: 20026021-20029518	Q2R2Z2_ORYSJ	SETIT_026768mg	VIII:28036317-28036528	K3ZJL5_SETIT	Zm00001d007436	2: 231673422-231677391	Q8W0W6_MAIZE
SbNF-YC7	Os04t0683400	4: 34891819-34892196	A0A0N7KTW7_ORYSJ	SETIT_021749mg	III:584347-585220	A0A368QA28_SETIT	Zm00001d026648	10: 149366118-149366501	A0A1D6N8W3_MAIZE
SbNF-YC8	Os03g0335600	3:12427176-12427478	Q851K9_ORYSJ	SETIT_021065mg	III:661898-662401	K3Z3J2_SETIT	Zm00001d006296	2:204007442-204007946	A0A1D6EUI5_MAIZE
SbNF-YC9	Os09t0480700	9: 18451612-18452708	NFYC6_ORYSJ	SETIT_0150321mg	VI:31832807-31833162	A0A368Q2Y8_SETIT	Zm00001d031310	1: 185845156-185845758	B6UA50_MAIZE
SbNF-YC10	Os02t0170500	2: 3846223-3850113	Q6H707_ORYSJ	SETIT_020107mg	I:35610175-35610748	K3YV53_SETIT	Zm00001d024230	10: 58448599-58449354	B4FWZ1_MAIZE
SbNF-YC11	Os08g0206500	8:6212357-6212462	Q6H707_ORYSJ		VI:2608055-2608134	A0A368RHD9_SETIT	Zm00001d028432	1: 34899450-34900187	B4FWZ1_MAIZE
SbNF-YC12	-	1:2658998-2659018	Q8W099_ORYSJ	SETIT_022020mg	III:43339034-43339257	A0A368QLM6_SETIT	Zm00001d023466	10: 6445727-6447046	K7TX38_MAIZE
SbNF-YC13	Os01t0102400	1: 139826-141555	Q93VF0_ORYSJ	SETIT_022020mg	III:43339107-43339261	K3YD33_SETIT	Zm00001d023466	10:6446772-6446916	B4FLF9_MAIZE
SbNF-YC14	Os05t0494100	5: 24275966-24280288	Q65X80_ORYSJ	SETIT_022720mg	III:14748347-14748441	A0A368QGQ1_SETIT	Zm00001d038557	6: 159799343-159805085	B8A1P0_MAIZE
SbNF-YC15	Os06t0667100	6: 27627768-27633037	Q6H707_ORYSJ	SETIT_007127mg	IV:38568669-38569060	K3XYW9_SETIT	Zm00001d046967	9: 113422355-113423101	A0A1D6LQ42_MAIZE
